# Supplementary material for: Lung Involvement in Primary Sjögren's Syndrome—An Under-Diagnosed Entity
Source: PubMed Central journal article supplement (PMC7378373; doi:10.3389/fmed.2020.00332), 2020-07-16
Supplement: Image_1.pdf [file Image_1.pdf]

# Lung Involvement In Primary Sjögren Syndrome – An Under-Diagnosed Entity

## Supplementary data Fig.S1

Fig. S1: Flow Chart showing the selection of patients with primary Sjögren Syndrome (pSS) and lung involvement.

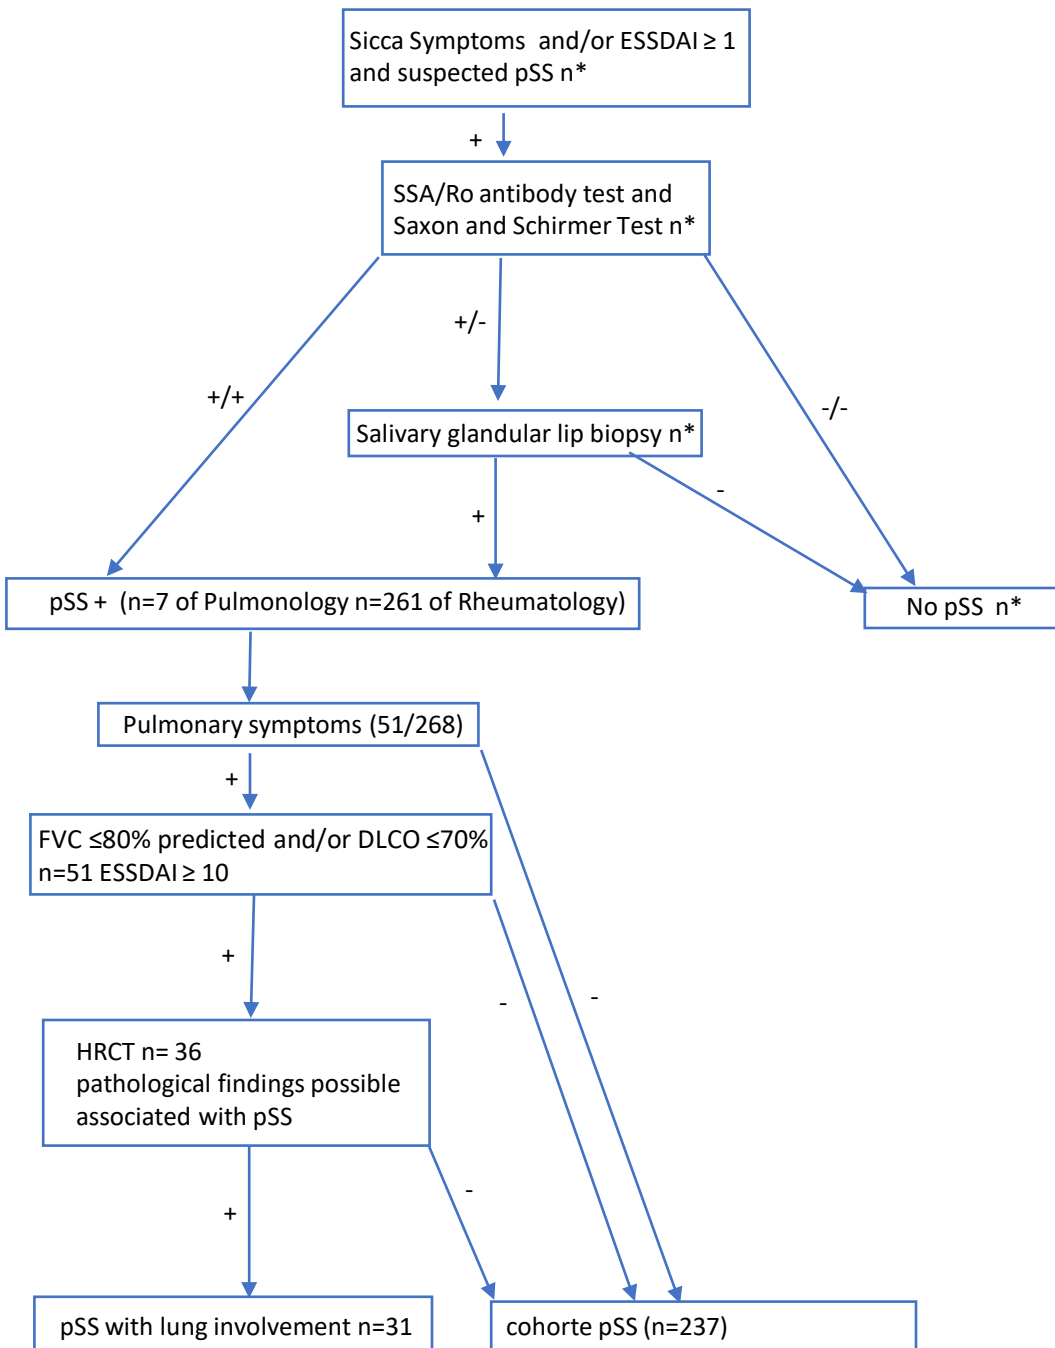

N\* numbers not documented, HRCT High Resolution Computed Tomography, ESSDAI EULAR Sjögren’s syndrome disease activity score, FVC forced vital capacity, DLCO diffusion capacity
